# Supplementary material for: Diet, Sun, Physical Activity and Vitamin D Status in Children with Inflammatory Bowel Disease
Source: MDPI journal article supplement (doi:10.3390/nu14051029), 2022-02-28
Supplement: s1 [file s1]

## Supplementary tables:

**Table S1.** Serum vitamin D level in study group depending on the clinical course of the disease, past medical history, risk factors and medications intake (Y=yes, N=no); mean $\pm$  SD, median (1<sup>st</sup>-3<sup>rd</sup> quartile); ANOVA, Kruskal-Wallis One Way Analysis of Variance on Ranks.

| Characteristi<br>c                    | 25OHD [ng/ml] (mean $\pm$ SD / median (25%-75%))                                                               |                   |                   |                                                         |  | P  |
|---------------------------------------|----------------------------------------------------------------------------------------------------------------|-------------------|-------------------|---------------------------------------------------------|--|----|
|                                       | IBD                                                                                                            | CD                | UC                | C                                                       |  |    |
| PCDAI/PUC                             |                                                                                                                |                   |                   |                                                         |  |    |
| AI:                                   |                                                                                                                | 19.75 (13.7-22.0) | 18.35 $\pm$ 6.82  |                                                         |  |    |
| 1                                     |                                                                                                                | 17.6 (14.3-23.55) | 19.54 $\pm$ 11.49 |                                                         |  |    |
| 2                                     |                                                                                                                | 25.9 (20.25-41.5) | 13.47 $\pm$ 1.58  |                                                         |  | NS |
| 3                                     |                                                                                                                | 14.65 (6.1-27.55) |                   |                                                         |  |    |
| 4                                     |                                                                                                                |                   |                   |                                                         |  |    |
| Location:                             |                                                                                                                |                   |                   |                                                         |  |    |
| L1/E1                                 |                                                                                                                | 16.3 (14.5-18.1)  | 12.96 $\pm$ 6.85  |                                                         |  |    |
| L2/E2                                 |                                                                                                                | 19.5 (14.2-25.6)  | 19.66 $\pm$ 8.66  |                                                         |  | NS |
| L3/E3                                 |                                                                                                                | 22 (18.4-24.57)   | 19.12 $\pm$ 10.42 |                                                         |  |    |
| L4/E4                                 |                                                                                                                | -                 | 18.92 $\pm$ 8.76  |                                                         |  |    |
| Fractures                             | Y – 19.8<br>(13.55-26.63)<br>N – 18.1<br>(14.2-22.68)<br>Y – 22.0<br>(19.0-23.28)<br>N – 17.3<br>(13.65-23.43) | *                 | *                 | Y – 16.9<br>(15.85-18.25)<br>N – 14.85<br>(11.55-19.15) |  | NS |
| Surgical<br>abdominal<br>intervention |                                                                                                                | *                 | *                 |                                                         |  | NS |

\*due to a small sample size, calculations were made only for IBD/C group.

**Table S2** Anthropometric values of IBD patients in two subgroups – those with vitamin D deficiency and with D level normal ; t-test.

|                | <20 ng/ml        | >20 ng/ml        | P     |
|----------------|------------------|------------------|-------|
| Weight z-score | -0.76 $\pm$ 1.03 | -1.04 $\pm$ 1.06 | 0.305 |
| Height z-score | -0.36 $\pm$ 1.22 | -0.69 $\pm$ 1.34 | 0.326 |
| BMI z-score    | -0.77 $\pm$ 0.86 | -0.77 $\pm$ 0.86 | 0.6   |

**Table S3.** Vitamin D level and BMI z-score in IBD patients; ANOVA, p=0.29.

| BMI z-score | Number of patients | Vit D level (ng/ml) |
|-------------|--------------------|---------------------|
| < -2        | 8                  | 18.1 (11.65-20.6)   |
| -2 to -1    | 13                 | 19.3 (14.42-26.28)  |
| -1 to 1     | 38                 | 17.9 (14.2-23.3)    |
| 1 to 2      | 3                  | 13.5 (4.12-18.15)   |
| > 2         | -                  | -                   |

**Table S4.** Frequency of physical activity of IBD and control group in different times of the year (1=everyday, 2=few times per week, 3=few times per month, 4=less than 1x per month).

| Season | Subgroup | Number of patients in % |       |       |       |       | P    |
|--------|----------|-------------------------|-------|-------|-------|-------|------|
|        |          | 1                       | 2     | 3     | 4     | 1+2   |      |
| Spring | CD       | 41.18                   | 44.12 | 5.88  | 8.82  | 85.30 | 0.12 |
|        | UC       | 25.0                    | 57.14 | 10.71 | 7.14  | 82.14 |      |
|        | C        | 44.68                   | 53.19 | 2.13  | 0.00  | 97.87 |      |
| Summer | CD       | 47.06                   | 35.29 | 8.82  | 8.82  | 82.35 | 0.39 |
|        | UC       | 50.00                   | 32.14 | 10.71 | 7.14  | 82.14 |      |
|        | C        | 48.94                   | 38.30 | 12.77 | 0.00  | 87.24 |      |
| Autumn | CD       | 35.29                   | 47.06 | 11.76 | 5.88  | 82.35 | 0.09 |
|        | UC       | 25.00                   | 57.14 | 14.29 | 3.57  | 82.14 |      |
|        | C        | 40.43                   | 57.45 | 2.13  | 0.00  | 97.88 |      |
| Winter | CD       | 32.35                   | 44.12 | 11.76 | 11.76 | 76.47 | 0.17 |
|        | UC       | 17.86                   | 60.71 | 14.29 | 7.14  | 78.57 |      |
|        | C        | 31.91                   | 61.70 | 6.38  | 0.00  | 93.61 |      |

**Table S5.** Frequency of physical activity throughout the year and vitamin D level in total group of patients.

| Points | Vitamin D level     |
|--------|---------------------|
| 0      | 12.95 (11.2-14.7)   |
| 2      | 12.1 (12.1-12.1)    |
| 4      | 14.5 (13.97-17.67)  |
| 5      | 19.3 (19.3-19.3)    |
| 6      | 19.15 (15.7-22.9)   |
| 7      | 13.8 (7.45-25.0)    |
| 8      | 17.2 (13.4-23.62)   |
| 9      | 18.7 (12.87-22.45)  |
| 10     | 17.6 (12.5-22.55)   |
| 11     | 13.95 (10.15-14.65) |
| 12     | 17.5 (14.2-21.0)    |
